# Supplementary material
Source: publisher figshare collection journal article supplement (https://asha.figshare.com/articles/dataset/_/13210799)
Supplement: Supplementary file 1 [file 1]

**Supplemental Material S2.** Intervention protocol of weekly readings for each father–child and mother–child dyad.

| Weeks             | Books read    | Day 1                                                                                                                                                                                     | Day 2                                                                                                                              | Day 3                                    |
|-------------------|---------------|-------------------------------------------------------------------------------------------------------------------------------------------------------------------------------------------|------------------------------------------------------------------------------------------------------------------------------------|------------------------------------------|
| Week 1            | Book 1        | Business-as-usual reading                                                                                                                                                                 | Business-as-usual reading                                                                                                          | Business-as-usual reading                |
| Week 2–<br>Week 3 | Books 2 and 3 | First decontextualized language strategy video<br>Four embedded cues for the new strategy                                                                                                 | Four embedded cues                                                                                                                 | Third book-reading without embedded cues |
| Week 4–<br>Week 5 | Books 4 and 5 | Second decontextualized language strategy video<br>Six embedded cues ( <i>four cues for the new strategy + two cues for the first strategy</i> )                                          | Six embedded cues ( <i>four cues for the new strategy + two cues for the first strategy</i> )                                      | Third book-reading without embedded cues |
| Week 6–<br>Week 7 | Books 6 and 7 | Third decontextualized language strategy video<br>Eight embedded cues ( <i>four cues for the new strategy + two cues for the first strategy + two questions for the second strategy</i> ) | Eight embedded cues ( <i>four cues for the new strategy + two cues for the first strategy + two cues for the second strategy</i> ) | Third book-reading without embedded cues |

*Note.* Each father–child and mother–child dyads per family had a different book for each week that included same type of decontextualized language strategy. Each dyad practiced each book three times during the intervention phase.
