# Supplementary material
Source: publisher figshare collection journal article supplement (https://asha.figshare.com/articles/dataset/_/13210799)
Supplement: Supplementary file 2 [file 1]

**Supplemental Material S1.** The books used in the implementation of the program.

1. *The Gruffalo* (Donaldson & Scheffler, 1999)
2. *The Gruffalo's Child* (Donaldson et al., 2005)
3. *The Snail and the Whale* (Donaldson, 2016a)
4. *Giraffes Can't Dance* (Andreae et al., 2002)
5. *The Secret Science Project That Almost Ate the School* (Sierra, 2006)
6. *Born to Read* (Sierra, 2008)
7. *Wild About You!* (Sierra, 2012)
8. *Dogs Don't Do Ballet* (Kemp, 2011)
9. *Rhinos Don't Eat Pancakes* (Kemp, 2015)
10. *Stick Man* (Donaldson, 2017a)
11. *The Legend of Spookley the Square Pumpkin* (Troiano, 2017)
12. *Those Darn Squirrels!* (Rubin, 2012)
13. *The Rainbow Fish* (Pfister, 1999)
14. *Enemy Pie* (Munson & King, 2000)
15. *Zog* (Donaldson, 2017b)
16. *Zog & the Flying Doctors* (Donaldson, 2016b)
17. *Crown: An Ode to the Fresh Cut Derrick Barnes* (Dedrick, 2017)
18. *Mighty, Mighty Construction* (Rinker, 2017)
19. *The Day the Crayons Quit* (Daywalt, 2013)
20. *Brave Enough for Two* (Voss, 2018)

## References

- Andreae, G., Parker-Rees, G., Williams, B. D., & Mansfield, D. (2002). *Giraffes can't dance*. Orchard.
- Daywalt, D. (2013). *The day the crayons quit*. Philomel Books.
- Dedrick, B. (2017). *Crown: An ode to the fresh cut Derrick Barnes*. Agate Bolden.
- Donaldson, J. (2016a). *The snail and the whale*. Pan Macmillan.
- Donaldson, J. (2016b). *Zog & the flying doctors*. Alison Green Books.
- Donaldson, J. (2017a). *Stick man*. Scholastic Canada.
- Donaldson, J. (2017b). *Zog*. Scholastic Canada.
- Donaldson, J., & Scheffler, A. (1999). *The gruffalo*. Macmillan Publishers.
- Donaldson, J., Scheffler, A., & Staunton, I. (2005). *The gruffalo's child*. Macmillan Publishers.
- Kemp, A. (2011). *Dogs don't do ballet*. Simon & Schuster.
- Kemp, A. (2015). *Rhinos don't eat pancakes*. Simon & Schuster/Paula Wiseman Books.
- Munson, D., & King, T. C. (2000). *Enemy pie* (Vol. 144). Chronicle Books.
- Pfister, M. (1999). *The rainbow fish*. NorthSouth Books.
- Rinker, S. D. (2017). *Mighty, Mighty Construction*. Chronicle Books.
- Rubin, A. (2012). *Those darn squirrels!* Houghton Mifflin Harcourt.
- Sierra, J. (2006). *The secret science project that almost ate the school*. Simon & Schuster Books for Young Readers.
- Sierra, J. (2008). *Born to read*. Knopf Books for Young Readers.
- Sierra, J. (2012). *Wild about you!* Knopf Books for Young Readers.
- Troiano, J. (2017). *The legend of Spookley the Square Pumpkin*. Prospecta Press.
- Voss, J. D. (2018). *Brave enough for two*. Henry Holt and Co.
